# Supplementary material for: Increased Nonexudative Age-Related Macular Degeneration Diagnosis Among Medicare Beneficiaries With Rheumatoid Arthritis
Source: PubMed Central journal article supplement — Invest Ophthalmol Vis Sci. 2019 Aug;60(10):3520–6. doi: 10.1167/iovs.18-26444 (PMC6694737; doi:10.1167/iovs.18-26444), 2019-08
Supplement: iovs-60-08-55_s01.pdf [file iovs-60-08-55_s01.pdf]

Supplementary Table: Baseline Distribution of Demographic and Morbidity Measure for RA and Control Populations

| Variable                               | RA Cohort<br>Mean (SD) or % | Control Cohort<br>Mean SD or % | Statistic |
|----------------------------------------|-----------------------------|--------------------------------|-----------|
| Age                                    | 73.6 (6.8)                  | 73.7 (7.3)                     | 0.1194    |
| Charlson Comorbidity Score             | 0.01 (0.38)                 | 0.06 (0.11)                    | <.0001    |
| Study Days                             | 1,251 (469)                 | 1,278 (472)                    | <.0001    |
| Female sex                             | 74.0%                       | 75.4%                          | <.0001    |
| Geographic Region:                     |                             |                                |           |
| Northeast                              | 20.0%                       | 19.6%                          | 0.2033    |
| North Central                          | 30.4%                       | 31.1%                          |           |
| South                                  | 28.6%                       | 28.7%                          |           |
| West                                   | 19.1%                       | 18.8%                          |           |
| Unknown                                | 1.9%                        | 1.9%                           |           |
| Elixhauser Comorbidities:              |                             |                                |           |
| Asthma                                 | 5.0%                        | 4.4%                           | <.0001    |
| Cardiac dysrhythmias                   | 12.6%                       | 12.3%                          | 0.2237    |
| Chronic obstructive pulmonary disease  | 10.8%                       | 9.2%                           | <.0001    |
| Conduction disorders of the heart      | 13.8%                       | 13.4%                          | 0.1361    |
| Congestive Heart Failure               | 4.3%                        | 4.1%                           | 0.1135    |
| Cystic fibrosis                        | 0.01%                       | 0.01%                          | 0.7437    |
| Diabetes with chronic complications    | 7.5%                        | 7.5%                           | 0.6343    |
| Diabetes without chronic complications | 17.5%                       | 17.2%                          | 0.4013    |
| Diverticulosis and diverticulitis      | 4.0%                        | 3.9%                           | 0.8103    |
| Epilepsy                               | 0.7%                        | 0.6%                           | 0.1144    |
| Heart valve disorders                  | 6.9%                        | 6.5%                           | 0.0266    |
| Hepatitis                              | 0.5%                        | 0.3%                           | <.0001    |
| HIV infection                          | 0.02%                       | 0.02%                          | 0.6230    |
| Hypertension                           | 48.4%                       | 47.8%                          | 0.1231    |
| Multiple sclerosis                     | 0.2%                        | 0.2%                           | 0.8335    |
| Otitis                                 | 2.0%                        | 1.8%                           | 0.0533    |
| Parkinson's Disease                    | 0.8%                        | 0.7%                           | 0.4021    |
| Peri-, endo-, and myocarditis          | 1.7%                        | 1.6%                           | 0.1731    |
| Pulmonary heart disease                | 1.5%                        | 1.1%                           | <.0001    |
| Schizophrenia                          | 0.1%                        | 0.1%                           | 0.3683    |
| Senile                                 | 3.0%                        | 2.7%                           | 0.0031    |
| Systemic lupus erythematosus           | 4.1%                        | 0.6%                           | <.0001    |
| Vertigo                                | 4.5%                        | 4.4%                           | 0.2941    |
